# **Perspectives on health, illness, disease and management approaches among Baganda traditional spiritual healers in Central Uganda.**

Yahaya H. K. Sekagya<sup>1,2, □</sup>, Charles Muchunguzi<sup>3</sup>, Payyappallimana Unnikrishnan<sup>4</sup> and Edgar M. Mulogo<sup>5</sup>

<sup>1</sup> Department of Pharmacy, Mbarara University of Science and Technology, Mbarara, Uganda

<sup>2</sup> Research and Training department, Dr. Sekagya Institute of Traditional Medicine, Uganda

<sup>3</sup> Department of Environment and Livelihoods Support Systems, Mbarara University of Science and Technology, Mbarara, Uganda

<sup>4</sup> Professor, University of Transdisciplinary Health Sciences and Technology, Bengaluru, India

<sup>5</sup> Department of Community Health, Mbarara University of Science and Technology, Mbarara, Uganda

Yahaya H. K. Sekagya (ORCID iD) 0000-0001-9721-7158

We have no known conflict of interest to disclose

□ Yahaya Hills Kagali Sekagya, E-mail; [ysekagya@gmail.com](mailto:ysekagya@gmail.com) (YHKS)

## Abstract

In Uganda, spirituality is closely associated with traditional healthcare; however, though prevalent, it is considered controversial, mystical, less-documented and often misunderstood. There is a paucity of literature on the description of health, illness, disease, and management approaches among traditional spiritual healers. This article examines perspectives on health, illness, disease and management approaches among Baganda traditional spiritual healers, the *Balubaale*, in central Uganda, who engage ancestral spirits in health care and management.

The study used a qualitative study design in particular grounded theory. Unstructured, qualitative interviews and observation were used on 12 male and female purposively selected *Balubaale* in Central Uganda. Data was transcribed, coded and thematically analyzed using ATLAS.ti. 22 Computer software based on an inductive approach.

Findings show that the words and concepts describing health, illness, disease and management approaches are descriptive and contextualized to include the problem, the prospected root-causes, and therapeutic approaches involved. The words for illness “*olumbe*”, disease “*obulwaddde*” and the management approaches such as divination (*kulagula*), ritual cleansing (*kwambulula*), amulets (*ensiriba* and *yirizi*), and scarification (*kusandaga*) have spiritual and social dimensions, contextual meanings and attachments.

Further research is recommended among other tribes and larger sample size to compare findings and terminologies to facilitate communication and policy considerations.

**Keywords:** Spiritualists (*Balubaale*), health, illness, disease, qualitative, Baganda, Buganda

## Introduction

Traditional spiritual healers are indigenous healers who believe in spiritual guides and use them during health management (1,2). The worldviews of traditional spiritual healers regarding health, illness, disease, and their management approaches are rooted in their local oral cultures and traditions, are highly stigmatized as evil and are associated with witchcraft (3). The colonizing ideology branded indigenous people as primitive and their knowledge systems rendered obsolete, irrelevant and worthless (2,4). In addition, the introduction of education curricula banned people from using their local languages, cultures, rituals and all spiritual things, and numerous unethical punitive laws and regulations were instituted (5,6). These are some of the primary reasons there is little research on this subject (7). Hoppers and Sandgren suggested an equitable dialogue between academy and indigenous knowledge holders (8), which should inform the social contracts that underpin the different understandings of knowledge within the diverse settings of global societies (9). It has documented that true knowledge and wisdom are better expressed and communicated as first-hand personal experiences in the vernacular knowledge of the people's places (10).

Traditional spiritual healers have had multiple accusations (11,12) and have lost pride and confidence in the use of their local descriptive words for health, illness, disease and health management approaches (13). Health management in the context of people's traditions and customs is encouraged since its existence determines the basis for its acceptance, criticism or rejection (14,15).

Even though the scientific disciplines of sociology and philosophy of medicine have their own concepts of health, illness and disease (16,17), it is not rational/valid to challenge indigenous research to uncover the traditional logic and methods about concepts with mainstream scientific equivalent. Instead the emphasis should be on traditional knowledge to continue research without undermining its knowledge or reducing its holistic cultural values

(18,19). However, the challenge remains for policy formulation where the use of local descriptions for health, illness, disease and health management may reflect divergent meanings in contemporary science (20,21).

Although, nearly 80% of the populations in developing countries use traditional medicine (14,22), it should be noted that indigenous spiritual healers and their use of local descriptive words during health management are not acknowledged (7,23). However, there are reported efforts to revitalize indigenous health systems towards achievement of sustainable development goals three (SDG3) to achieve universal health coverage (UHC) (24,25). Unfortunately, most efforts have been directed towards understanding herbal medicine from biomedical perspectives, consequently excluding spirituality and the totality of traditional medicine from mainstream health care options (13,26,27). Other related studies focus on the perception of illness by patients (28–32), and exclude the perceptions of the indigenous spiritual healers. Some authors argue for intra-cultural learning to understand and appreciate culturally embedded worldviews (23,33), and attached meanings.

Often traditional spiritual healers may sound superstitious, and are usually only understood by communities of spiritualists. Their health care practices, understanding and descriptions of health, illness, disease need to be explored further and explained to global audience even when scientific explanations justifying their clinical practices may be missing (34). The Uganda national policy guidelines on traditional medicine recommended the importance to understand and build consensus about basic definitions, terminologies and classifications of health, illnesses and diseases by various sub-categories of traditional medicine so as to promote information sharing, policy formulations and research methodologies (35), to enable the conceptualization of traditional health care practice in various cultures. Despite the national recommendations and policies, there is a paucity of literature that describes health, illness, disease and management approaches as understood by

traditional spiritual healers in Uganda. The purpose of the study was to explore the descriptions of health, illness, disease and health management among Baganda traditional spiritual healers in Central Uganda.

## Method

### Study Design and Setting

A qualitative and exploratory research design using ethnographic approach was used to explore terminologies that described health, illness, disease and for health management practices among *Balubaale* in Central Uganda. Uganda area covers 241.555 km<sup>2</sup> and is divided into four regions namely Eastern, Western, Northern and Central. It has 156 districts and a population of 44.2 million people of which 88.6% are in rural areas and subsistence farmers (36). Central region is where the *Balubaale* who engage ancestral spirits during health management are most concentrated in Uganda.

### Sampling and Data Collection

We identified participants through their governing associations (NACOTHA, Uganda N'eddagala Ly'ayo, Uganda N'eddagala N'obuwangwa Bwaffe) by their leaders (37).

District and cultural leaders completed additional identification. We approached the Healthcare spiritualists at their work places (shrines) and invited them to participate. All the remaining twelve (10Male; 2 Female) participants who agreed and fulfilled the inclusion criteria and signed an informed consent were recruited for the study between 15<sup>th</sup> July 2019 and 29<sup>th</sup> April 2020, and were prospectively interacted with for two years. Figure 1 below shown the study profile of the participants

**Figure 1: Study Profile.**

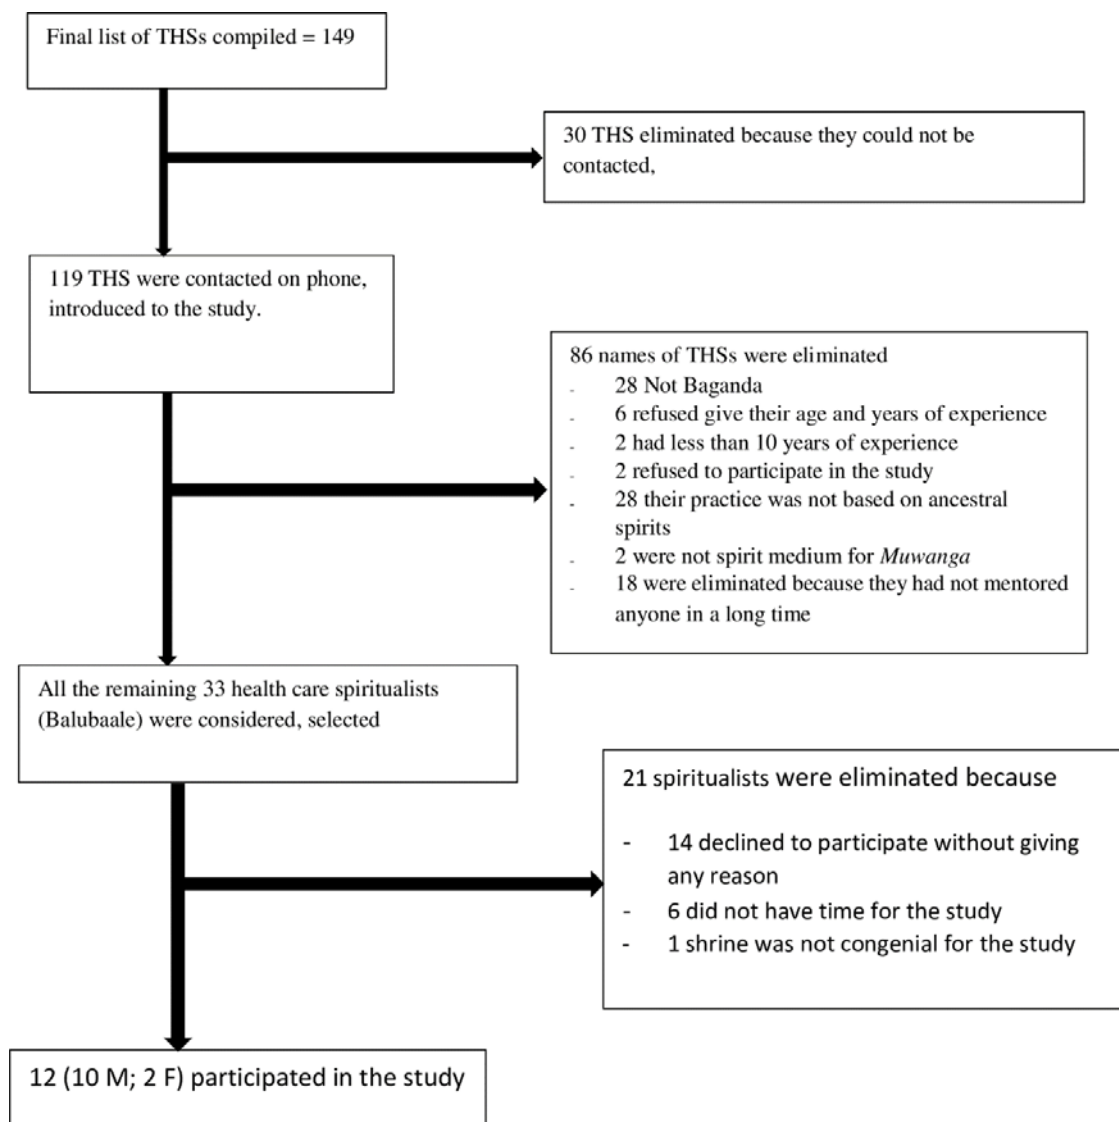

The inclusion criterion of being a spirit medium for Muwanga affected the need to balance male and female representation. Anybody below 18 years old were excluded. Twelve (10M, 2F) adult healthcare spiritualists (*Balubaale*) residing and working in Central Uganda were purposefully selected (38), based on their background knowledge and at least 10 years of experience. Selected participants were mediums for ancestral spirits including spirit Muwanga. Related studies successfully used small numbers of participants and retained validity in their studies (37,39). Data was collected through unstructured interviews using open-ended questions and partial integration observation methods. The first author closely worked with the study participants at their work places for two years and participated in some daily health care activities. He interviewed the practitioners as appropriate which lessened interference with their usual practices.

## **Data management and analysis**

The researcher and research assistants directly translated the data into English while preserving the rich context in Luganda, the local language of spiritualists. Transcribed data was coded and thematically analyzed using ATLAS ti. 22 Computer software based on an inductive approach.

## **Ethics consideration**

Ethical approval of this study was sought and obtained from the Research and Ethics Committee at Mbarara University of Science and Technology (No. MUREC 1/7) and the Uganda National Council of Science and Technology (SS 4947). The study was also cleared by Traditional Healers' Associations (NACO/0485/2019) and Buganda Kingdom and the Office of the President (ADM 194/212/01). Written informed consent was also obtained from the individual subjects.



## Findings

### Socio-demographic characteristics of respondents

The study participants were twelve (10 Male, 2 Female) Baganda traditional spiritual healers using ancestral spirits in health management (*Balubaale*). They were aged between 27 and 77 years (Mean age 54), from eight Buganda Counties, eleven Districts, and nine Baganda clans. The majority (66%, n=8) belonged to traditional religion. Two never attended school, six never completed primary level, and four entered secondary level. All respondents belonged to healers' associations, had more than ten years of experience and were subsistence farmers.

### Description of health, illness and disease among spiritualists

Concepts that described health, illness, and disease among *Balubaale* were embedded in words and phrases used during the various health management approaches. Research findings were based on responses and observed communications of spiritualists while in normal states and as spirits possessed them during health care practices. When the words were analyzed, most of them did not have English equivalent in mainstream medicine. They were left in Luganda, and were given a meaning in English close to the intended meaning in the local language. The words imitated descriptive root causes, therapeutic approaches, and or associated ancestral spirits. Other words were directly connected with used natural materials such as plants, animals, birds and water sources, influenced by the cultural settings.

Words and phrases used to describe good health varied depending on the state of the spiritualists. Spiritualists used straightforward words and phrases for good health in their normal states, but when they were acting as spirit mediums, the words became more complex.

## Perspectives on Good Health

The phrase used to describe good health by the spiritualists while in their normal states was “*obulamu obulungi*”. However, when possessed by ancestral spirits they used a word “*bweeza*”. According to the research findings *obulamu obulungi* (good health) is a complex concept that is bi-dimensional focusing on physical and nonphysical health.

### Physical and Psychological health

Good health in relation to physical and psychological health includes words that refer to the physical body (*omubiri*), mental (*obwongo*), psychic (*ebirowozo*), and behavior (*empisa*). The spiritualists expressed that much of the manifestations in the physical and psychological reality were mainly at the non-physical level.

### Nonphysical health

*Obulamu obulungi* (good health) goes beyond describing the desirable physical human health. It also focuses on non-physical self, including the state of the soul and the good relations with ancestry. For example, one participant said that “... *good health includes aspects of the body, spirit, mind, moral, and soul*” (Participant 4 [M, 60’s]). Furthermore, *obulamu obulungi* focuses on the affordability of basic human needs such as food and shelter for individuals and their family members. Good health was also associated with success in one’s endeavors, happiness, joy, stable family, having children and having good friends. For example, “... *good health is when a person can afford basic needs like food and housing for self and family*” (Participant 5 [M, 60’s]). The participants made it clear that good health does not mean that one did not get ill or have disease, but one has the ability to timely access appropriate health care to address their biomedical, social, cultural, mental and spiritual causes of their undesired health. According to the participants, good health was also contributed to by good luck (*omukisa*).

“*Bweeza*”, on the other hand, was frequently used by the spiritual healers, spirit mediums and the ancestral spirits for good health during trance. *Bweeza* is usually aligned with good health and the inner peace that it comes with. For example, “... *bweeza is a summary word for good health.*” (Participant 4 [M, 60’s]), and “... *bweeza means, and is associated with peace.*” (Participant 9 [M, 50’s]). *Bweeza* was also associated with blessings, fertility, bearing of twins and rain.

### **Perspectives on illness (*olumbe*) and disease (*obulwade*)**

Illness was referred to as *olumbe*. Participants described *olumbe* as an unclear and unnamed bad health condition that often occurs suddenly and has many possible root causes. In addition, the person who suffers from *olumbe* sometimes has a number of complicated medical conditions which are often not cured by mainstream medical approaches. For example, one participant said; “... *olumbe is something very difficult to understand, is associated with powers of darkness and very difficult to explain.*” (Participant, 12 [M, 20’s])

Furthermore, participants described *olumbe* in relation to its prospected root-causes, majorly the ancestral spirits (*Lubaale*) and witchcraft (*ddogo*). *Lubaale* was considered responsible for causing *olumbe* especially when the ancestral spirits have unfinished business with the person or family. When there are unmet demands, *olumbe* manifests in the physical body, psych and social status of an individual or family. The participant continued to explain that *olumbe* due to ancestral spirits may spread into the whole body before it manifests, has hereditary tendencies, and takes a while to treat. One participant said; “*Olumbe attacks the soul and spirit, take long to be noticed, and may as well be inherited.*” (Participant 5 [M, 60’s]).

Nearly all illnesses were attributed to witchcraft. Witchcraft was used to describe invisible, spiritual, or physical manifestation of illness caused by an individual towards another, using words and materials with spiritual powers, usually out of jealousy. One

participant explained that *"illness may be caused by witchcraft sent by another person out of jealousy."* (Participant 12 [M, 20's]). *Olumbe* due to witchcraft may affect an individual and the whole family, and if it results in death, the individual dies with it, and such *olumbe* is often inheritable, unless the needful is resolved. Among Baganda, *olumbe* is expelled out of the family by performing ritual of the last funeral rites after someone has died.

On the other hand, the study participants did not express any singular word for disease, but a multitude of signs and symptoms that manifested on the physical and biological body parts such as fever, pain and vomiting. *Obulwadde* takes on the name of the affected body parts, as clarified by one participant *"... disease affect the body parts or organs and manifest as symptoms of pain in the head, eyes, nose, teeth, liver, kidneys, intestines, heart, lungs, legs, arms, etc."* (Participant 3 [F, 60's]). In other words, *obulwadde* was not connected to any root-causes nor any spirits.

### **Differences between illness (*olumbe*) and disease (*obulwadde*)**

For the majority of the participants there was a clear distinction between illness and disease in terms of root-causes, effects, and the management processes. During health assessment, illness (*olumbe*) was connected to ancestral spirits and witchcraft as root causes, while diseases (*obulwadde*) were attributed to causes of organisms such as bacteria and worms, and/or physiological malfunctions of the related organs. For the effects, illness (*olumbe*) majorly affected the non-biological parts of human such as the soul and spirit, while the disease (*obulwadde*) affected the biological body organs and their functions. For example, one participant explained; *"illness only engulfs the body but does not enter into the body organs, while the disease attacks and destroys the body organs"* (Participant 3 [F, 60's]).

The management process for illness (*olumbe*) was mainly through rituals engaging use of energies from living and non-living things, symbols and communication with ancestors to prevent and/or remove the causative agent and protect against other attacks.

Participants reported that illness (*olumbe*) is not cured by biomedical treatment, but gets worse instead. The management of disease (*obulwadde*) attacks to kill offending macro/micro organism and restore the function of the affected organs through treatment using herbs and physical manipulations. One participant explained; "*illness is when the disease gets worse and fails to respond to biomedical treatment and finally leads to death. That is why the last funeral rites are performed to exit the illness out of the deceased's house*" This means that it is the *olumbe* which actually finally kills a person." (Participant 10 [M, 40's]).

Although majority of participants could distinguish between the concepts of illness and disease, some participants did not find it important to differentiate between these concepts of illness and disease, and they were considered the same. For example, one participant said "*Illness and disease refer to the same thing, they are the same.*" (Participant 11 [M, 50's])

Study participants reported that they used particular words for health assessment and health management depending on context. It was reported that these words and phrases are imbued with powers and authority of the spiritualists, and were potentiated by use of specific rituals, prayers and sacrifices, which were, at times, carried out in specified sacred places and different aspects of the process. Some of these descriptive words cut across the different domains of prevention, protection, treatment, and health promotion depending on context. To best understand these concepts well, we have subdivided them into two sections. The words used in health assessment process and words used in the health management process.

Words used for the health assessment include *kulagula* (divine/diagnosis), and *kwaaza Lubaale* (cultural ritual process of investigating ancestral spirits) are detailed below.

### **Divination (*Kulagula*)**

According to the research participants, divination (*kulagula*) describes a cultural process of health assessment and diagnosis among *Balubaale*. It usually focuses on

assessment and diagnosing of illness, rather than disease. During divination, the spiritual healers may foretell and give advice to their clients based on reflective and future foresight of what may or may not be known to the clients. They also support their clients in taking appropriate actions. *Kulagula* is conducted through supernatural means and its purpose is to find out clients' needs, root causes of particular situation, and knowledge and information about future unknown spiritual aspects. One participant said "...divination is the process we use to know, inform, foretell and advise our clients based on reflective and future foresight". (Participant 7 [M, 50's])

During divination, the spiritual healers usually use a health assessment tool (*omweso*), and a process involves throwing up of shells and beads that have particular meaning and connotation depending on how they fall in relation to one another. The number of times they throw up the shells and beads depend on the nature of the problem and guidance by the invoked ancestral spirits in charge of the divination. The divination process is started off by getting in touch with *Muzimu*, (*Mizimu* for plural), the spirit of a dead person, that owns the rest of ancestral spirits, that may manifest and talk through a human spirit medium. Divination is usually followed with exploration of ancestral spirits and related words.

### **Exploration of Ancestral Spirits (*Okwaaza Lubaale*)**

*Okwaaza Lubaale* is a cultural ritualistic process of exploration of family and clan ancestral spirits. The process, often prompted by illness or disease, engages family and clan members and is led by known and knowledgeable spiritualist (*Ssenkulu*). It included cleansing rituals, singing, drumming and calling upon ancestral spirits to express themselves, and establish root cause of illness and disease. One participant stated that "*okwaaza Lubaale is a Baganda cultural practice to explore clan ancestral spirits. It also serves to diagnose and establish root cause of problems within family.*" (Participant 7 [M, 50's]).

## Health management process

The Luganda word that best describes the health Management process is *Kuganga*, a measure taken by the spiritual healer to treat and protect the physical and non-physical bodies, the mind and spirit against problems, spiritual attacks and witchcraft. It also includes protection of family, home, or property, and is often performed under instructions and guidance of ancestral spirits. “... *okuganga is a form of power used for protection and prevention against evil spirits and associated problems.*” (Participant 6 [F, 60’s]). *Kuganga* may include ritual cleansing (*kwambulula*), scarification (*kusandaga*), amulets (*ensiriba* and *yirizi*), concoction of herbs for ritual baths (*kyoogo*) and decoction of herbal mixture for bathing children (*kyogero*).

### Ritual Cleansing (*Kwambulula*)

Participants expressed that *kwambulula* is a ritualistic methodological cleansing process involving techniques linked to spiritual powers of living materials such as plants, animals, and birds, and non-living materials including waters, rocks and minerals. These materials are used in combination with ancestral spirits and other spiritual powers invoked by the spiritual healer. *Kwambulula* serves to remove undesired spiritual influences from individuals and families, for purposes of protection, prevention, treatment and health promotion. *Kwambulula* is used to cleanse shrines. For example, one participant explained “*Shrines are routinely and ritualistically cleansed of any evil spirits, un-appropriate previous undertakings or witchcraft.*” (Participant 2 [M, 70’s])

### Scarification (*Kusandaga*)

Participants described *kusandaga* (scarification) as health management approach that involves incisions on physical body with sharp instruments. The freshly made incisions serve as a way of introducing medications into human body to prevent, protect and promote good health. Participants believed medication put on freshly made incisions is more effective when

it gets in contact with human blood while inside the body. Scarification is usually done by a trained spiritual healer, although sometimes, the ancestral spirits themselves make scarifications to the clients. One participant reported, “... *at times, the ancestral spirits do scarification to clients at night while they are sleeping.*” (Participant 3 [F, 60’s]). However, it was noted that some spirits did not subscribe to rituals involving scarification nor contact with human blood.

### **Amulets, (*Nsiriba and Yirizi*)**

Amulets such as *nsiriba* and *yirize* were described as combinations of small pieces of physical materials with spiritual powers. Physical materials included parts of animals, birds, insects, reptiles, rocks, plants and minerals ritualistically imbued with ancestral spiritual powers. Amulets are tied together and put close to the body for prevention and protection against intentional and non-intentional negative influence of evil spirits and witchcraft. It is common practice to place the amulets in one or more places of the waist, ankle, wrist or upper part of the arm of the individual depending on the instructions given by the spiritual healer or the ancestral spirits.

### **The Concepts of *Kyoogo* and *Kyogero***

*Ekyoogo* was described as a concoction of medicinal herbs, with spiritual values, mixed with water, and are used for ritualistic cleansing and spiritual sanitization of people, especially before acceptance into spiritual space or spiritual activities. For example, one participant described “*Kyoogo is concoction used for cleansing, especially during most spiritual activities. Water type, its content, and timing for ritual cleansing are dependent on purpose of undertaken ritual and guidance by ancestral spirits.*” (Participant 1 [M, 40’s])

*Kyogero* was defined as a decoction of medical herbs with spiritual powers used to bath infants and children to cleanse, immunize, prevent, treat, protect, and provide good luck. It is bathed daily, continuously for most of the infants and early childhood years.





## Discussion

The main findings to the research question “what words do you use to describe health, illness and disease?” were visualized beyond the bodily physical health to include non-physical aspects of health such as the spirit, soul and good relations with spiritual, social, cultural and ancestral life. Illness is attributed to disgruntled ancestral spirits and witchcraft, while disease is attributed to biological and physical damages of the body and its physiological functions. These descriptions are similar with what has been described elsewhere (40,41), and support the argument that health is not a universal concept (42–44). Health is variably approached and interpreted by numerous people, cultures, societies and groups, and there is no single approach that can comprehensively define health in a way that would stand valid and good for all the people, in all communities and places (45). This is in line with WHO definition of health, as a state of complete physical, mental and social well-being and not merely the absence of disease or infirmity, promoted social welfare as an integral component of overall health, and linked health to social environment and living and working conditions (46). This definition prompts advocating for working, practical, and operational definitions of health, and adoption of policies and programs for maintaining and improving health (15).

Many authors clearly distinguished disease from illness (32,41). Disease relates to concepts of the proper anatomical, physiological and biological irregularities and dysfunctions of body organs, tissue and cells (47–49). This aligns with the universal definition of disease which is based on objective, empirically identifiable, measurable, neutral and value-free pathological issue, engaging microorganisms and health determinants that can be epidemiologically and bio-statistically determined (50,51).

Illness, on the other hand, is perceived as personal and interpersonal suffering based on social-cultural standards and values (3,52,53), with a multitude of signs and symptoms that may or may not manifest on the human body (41). Illness is philosophically based on mystical concepts (40,54), which are usually culturally structured (42,55,56), and attached with various social meanings (57,58). Some authors documented illness as an unclear and unnamed spiritual health condition caused by ancestral spirits and witchcraft (40), whose description of illness is embedded in people's cultures. Other authors assert that illness is associated with misfortunes (59,60) and somatic experiences reflective of bad relations with supernatural forces and ancestral spirits (61). Illness has various possible cause that may include, but not limited to curses, witchcraft, and failure to observe social taboos (62), while others indicate that illness may manifest as a divine punishment (42,63).

In contrast, some authors expressed illness and disease were in perspectives of first person and third person, where illness is the first person experience and feeling of the condition (48,64), while disease is the third person's perspective and knowledge of somebody's medical condition (64,65). However, Inthorn expressed the same but differently, when he said that illness is the subjective understanding of the lack of health, while the perspective of medical professionals on medical conditions is the disease (66,67). They, nonetheless, added that illness and disease are not the same, since a person can feel well and at the same time have an undiscovered tumor, or a person can feel sick without a medical condition (66).

Another important aspect is the concept of health assessment that involve divination and ritual cleansing to establish the health status (68), the prospected root cause, the appropriate management approaches and prevention (3,40,69). For example, traditional healers in North Eastern Ethiopia use divination to establish the etiology of illness (70), while other healers use divination to distinguish between illness of supernatural origin and illness

described as of normal or natural (71). It should be noted that this contrasts with western medicine approach (white Man's approaches) where health status and illness are assessed with physical examination involving inspection, palpitation, percussion and auscultation (72,73).

Another example is ritual cleansing which aligns with cultural practices of the Swati traditional healers in Mpumalanga Province, South Africa who use ritual cleansing to manage depression and mental illness (74). In a related case, in Peru, Ayahuasca rituals are used to cleanse and understand the meaning of the illness and establish a balanced relationship with illness and treatment (75). In Indonesia, traditional rituals are used to reduce anxiety and build better mental health in response to natural and non-natural illness (76), while in Northern Uganda, spiritual healers use diagnostic rituals to establish spiritual causes of illness (3).

## **Study limitations**

Although this study was conducted at multiple healers' shrines (sites), it was limited to one tribe, Baganda, and one category of traditional spiritual healers (*Balubaale*). This limited the breadth of the data as other categories of traditional healers could have provided different perspectives or relevant information to the research question. Another limitation is that the study-area was limited to Central Uganda. Possibly, if the study area was extended beyond the Central Region, more insightful conclusions could have been generated. The small number of 12 participants was also a limitation to the study. These limitations restrict the generalizability of the study findings, even though the researcher closely worked with the research participants for two years, which enabled the researcher access sacred places and privileged information.

## **Conclusion and recommendation**

The research findings show that although the concepts of health, illness, disease are universally used and are assumed to mean the same thing, Baganda traditional spiritual healers (*Balubaale*) use them uniquely and differently. These words and the health management methods and approaches have a cultural context and are descriptive of the nature of problem, prospected root causes, therapeutic interventions, and associated spiritual entities. These findings are significant and must be recognized and valued for policy considerations in order to build and empower ancestral knowledge and healing.

We recommend more studies in other ethnic or tribal groupings, to explore words used to describe health, illness, disease and related management approaches so as to compare results and guide inter-medical systems communication and health policy formulations.

## **Acknowledgement**

We are indebted to the leadership of Mbarara University and Pharmbiotrac program for soliciting the financial support for the first author PhD study, in particular, Dr. Casim Tolo, Professor Patrick Ogwang and Engineer Anke Weisheit. We extend my utmost gratitude to the study participants and their spiritual guides for information, free atmosphere and time extended to the research process. We are grateful to the leaders of traditional healers' associations, namely Sylvia Namutebi (Maama Fiina) of Uganda N'eddagala Ly'ayo N'obuwangwa Bwaffe, Musasizi Karim of NACOTHA, and Karim Walyabira of Uganda N'eddagala Ly'ayo. We are thankful to Buganda Kingdom administration for introducing us to the clan leaders whose support made the interaction with the spiritualists smooth. We thank the research assistants Mr. Eric Kibirige Mukasa and Ms. Nambuya Barbra for the field work. We also thank Dr. John Chrysostom Katongole of Munyonyo Botanical Gardens,

Jovent K. Obbo of Bugema University and Dr. Kizito Simon of Makerere University for their comments on the draft report.

## **Supporting information**

All the data supporting our findings are contained in the paper.

## Reference

1. De Taeye L. Living Presence in Postcolonial Congo: A Comparison between the Narrative Evocations of Ancestral Spirits in Jacques Bergeyck's *Het stigma* and Sony Labou Tansi's *La vie et demie*. *Canadian Review of Comparative Literature / Revue Canadienne de Littérature Comparée*. 2022 Mar;49(1-2):155-69. <https://muse.jhu.edu/article/881618> DOI: 10.1353/crc.2022.0008
2. Reddy S, Subedi B, Guite N. Introduction: Ethnomedicine and Tribal Healing Practices in India: Challenges and Possibilities of Recognition and Integration. In: Reddy S, Guite N, Subedi B, editors. *Ethnomedicine and Tribal Healing Practices in India: Challenges and Possibilities of Recognition and Integration*. Singapore: Springer Nature Singapore; 2023. p. 1-31. [https://doi.org/10.1007/978-981-19-4286-0\\_1](https://doi.org/10.1007/978-981-19-4286-0_1) DOI: 10.1007/978-981-19-4286-0\_1
3. Mwaka AD, Achan J, Orach CG. Traditional health practices: A qualitative inquiry among traditional health practitioners in northern Uganda on becoming a healer, perceived causes of illnesses, and diagnostic approaches. Olorunlana A, editor. *PLoS ONE*. 2023;18(4). <https://dx.plos.org/10.1371/journal.pone.0282491> DOI: 10.1371/journal.pone.0282491
4. Western Carolina University, Lefler L. Traditional Knowledge and Health: Lessons from the Eastern Band of Cherokee Indians. *SASPro*. 2020;45(1):110-25. [https://egrove.olemiss.edu/southernanthro\\_proceedings/vol45/iss1/8](https://egrove.olemiss.edu/southernanthro_proceedings/vol45/iss1/8) DOI: 10.56702/MPMC7908/saspro4501.7
5. The Witchcraft Act. 1956; 1935; 1928, 1998.
6. Mesaki S. Witchcraft and the law in Tanzania. *International Journal of Sociology and Anthropology*. 2009;1(8):132-8. <http://www.academicjournals.org/ijasa>
7. Haverkort B, Millar D, Shankar D, Burgoa DF. Relation between different knowledge communities: Rejection, substitution, complementarity, and co-creation of sciences. In: Haverkort B, Millar D, Shankar D, Burgoa DFreddy, editors. *Towards Co-creation of Sciences: Building on the Plurality of Worldviews, Values and Methods in different knowledge communities*. New Dehli, India: Nimby Books, Content Services & Publishing Pvt Ltd.; 2012.
8. Hoppers CAO, Sandgren B. Meeting of minds and futures: The nature of knowledge in diverse global settings. *Journal of Adult and Continuing Education*. 2014 Nov;20(2):79-91. <http://journals.sagepub.com/doi/10.7227/JACE.20.2.7> DOI: 10.7227/JACE.20.2.7
9. Hoppers CAO. Beyond critique to academic transformation: Reconceptualising rurality in the global south. *Postcolonial Directions in Education*. *Postcolonial Directions in Education*. 2017;6(2):145-64. <https://www.um.edu.mt/library/oar//handle/123456789/26045>
10. Bartel R. Vernacular knowledge and environmental law: cause and cure for regulatory failure. *Local Environment*. 2014 Sep 14;19(8):891-914. <http://www.tandfonline.com/doi/abs/10.1080/13549839.2013.798636> DOI: 10.1080/13549839.2013.798636
11. Kabumba B. Criminalizing Indigenous Belief: The Constitutional Deficits of Uganda's Witchcraft Act. *Oxford Journal of Law and Religion*. 2023 Nov 8;rwad014. <https://academic.oup.com/ojlr/advance-article/doi/10.1093/ojlr/rwad014/7385751> DOI: 10.1093/ojlr/rwad014

12. Rukundo S. Witch-Killings and The Law in Uganda. *J law relig.* 2020 Aug;35(2):270–96. [https://www.cambridge.org/core/product/identifier/S0748081420000259/type/journal\\_article](https://www.cambridge.org/core/product/identifier/S0748081420000259/type/journal_article) DOI: 10.1017/jlr.2020.25
13. Adu-Gyamfi S. From vital force to the scientific or an admixture: A historical discourse on individuals value for indigenous medical practices in Ghana. *Journal of Basic and Applied Research International.* 2018 Mar;
14. World Health Organization. WHO traditional medicine strategy: 2014-2023 [Internet]. Geneva: World Health Organization; 2013. 76 p. <https://iris.who.int/handle/10665/92455>
15. Svalastog AL, Donev D, Jahren Kristoffersen N, Gajović S. Concepts and definitions of health and health-related values in the knowledge landscapes of the digital society. *Croat Med J.* 2017 Dec;58(6):431–5. <https://www.ncbi.nlm.nih.gov/pmc/articles/PMC5778676/> DOI: 10.3325/cmj.2017.58.431
16. Hofmann B. On the triad disease, illness and sickness. *Med Health Care Philos.* 2002;27:651–73. DOI: <https://doi.org/10.1076/jmep.27.6.651.13793>
17. Sadegh-Zadeh K. Fuzzy health, illness, and disease. *J Med Philos.* 2000;25:605–38. DOI: [https://doi.org/10.1076/0360-5310\(200010\)25:5;1-W;FT605](https://doi.org/10.1076/0360-5310(200010)25:5;1-W;FT605)
18. Ngeh SE. Conflicting interests between public health and custodians of indigenous knowledge with regards to curation and dissemination of information about Xhosa initiation rites. 2019; <http://hdl.handle.net/11427/30847>
19. Poirier B, Sethi S, Haag D, Hedges J, Jamieson L. The impact of neoliberal generative mechanisms on Indigenous health: a critical realist scoping review. *Global Health.* 2022 Jun 15;18(1):61. <https://globalizationandhealth.biomedcentral.com/articles/10.1186/s12992-022-00852-2> DOI: 10.1186/s12992-022-00852-2
20. Chen YY, Liu J, Chen H, He Y, Chen H. Divergence and integration of identification methods for geriatric mental health disorders in nonspecialized institutions—a qualitative study of service providers from different departments in Shanghai, China. *Aging & Mental Health.* 2023 Mar 2;1–9. <https://www.tandfonline.com/doi/full/10.1080/13607863.2023.2180798> DOI: 10.1080/13607863.2023.2180798
21. Mthembu MV, Ndzinisa N. Expanding Language? Struggles that Characterise the Development of New Words and Meanings on Eswatini’s National Radio. In: Mpofu P, Fadipe IA, Tshabangu T, editors. *Indigenous African Language Media.* Singapore: Springer Nature Singapore; 2023. p. 117–35. [https://link.springer.com/10.1007/978-981-99-0305-4\\_8](https://link.springer.com/10.1007/978-981-99-0305-4_8) DOI: 10.1007/978-981-99-0305-4\_8
22. Haque IMd, Chowdhury ABMA, Shahjahan Md, Harun, Dostogir GMd. Traditional healing practices in rural Bangladesh: a qualitative investigation. *BMC Complementary and Alternative Medicine.* 2018;18(62). DOI: [doi.org/10.1186/s12906-018-2129-5](https://doi.org/10.1186/s12906-018-2129-5)
23. Kajawu L, Chiweshe M, Mapara J. Community perceptions of indigenous healers and mental disorders in Zimbabwe. *OJPsych.* 2019;09(03):193–214. <http://www.scirp.org/journal/doi.aspx?DOI=10.4236/ojpsych.2019.93015> DOI: 10.4236/ojpsych.2019.93015



24. Kasilo OMJ, Wambebe C, Nikiema JB, Nabyonga-Orem J. Towards universal health coverage: advancing the development and use of traditional medicines in Africa. *BMJ Glob Health*. 2019 Oct;4(Suppl 9):e001517. <https://gh.bmj.com/lookup/doi/10.1136/bmjgh-2019-001517> DOI: 10.1136/bmjgh-2019-001517
25. Holmes D. Report of the global conference on primary health care: From Alma-Ata towards universal health coverage and the sustainable development goals [Internet]. Astana Kazakhstan: WHO; 2019. Report No.: WHO/UHC/IHS/2019.62. ; <https://creativecommons.org/licenses/by-nc-sa/3.0/igo>.
26. Krah E, Kruijff J de, Ragno L. Integrating Traditional Healers into the Health Care System: Challenges and Opportunities in Rural Northern Ghana. *J Community Health*. 2018;43:157–63. DOI: 10.1007/s10900-017-0398-4
27. Page-Reeves J, Niforatos JD, Mishra S, Regino L, Gingerich A, Bulten R. Health Disparity and Structural Violence: How Fear Undermines Health Among Immigrants at Risk for Diabetes. *Journal of Health Disparities Research and Practice*. 2013;6(2):Article 3.
28. Clarke A, Yates T, Smith AC, Chilcot J. Patient’s perceptions of chronic kidney disease and their association with psychosocial and clinical outcomes: a narrative review. *Clin Kidney J*. 2016;9:494–502. <https://doi.org/10.1093/ckj/sfw014>.
29. Glattacker M, Heyduck K, Meffert C. Illness beliefs and treatment beliefs as predictors of short and middle term outcome in depression. *J Health Psychol*. 2013;18:139-52. <https://doi.org/10.1177/1359105311433907>.
30. Heyduck K, Meffert C, Glattacker M. Illness and treatment perceptions of patients with chronic low back pain: characteristics and relation to individual, disease and interaction variables. *J Clin Psychol Med Settings*. 2014;21:267–81. <https://doi.org/10.1007/s10880-014-9405-4>.
31. Kaptein A, Schoones J, Fischer M, Thong M, Kroep J, van der Hoeven K. Illness perceptions in women with breast cancer-a systematic literature review. *Curr Breast Cancer Rep*. 2015;7:117–26. <https://doi.org/10.1007/s12609-015-0187-y>
32. Seidlein AH. Illness and disease: an empirical-ethical viewpoint. *BMC Medical Ethics*. 2019;20(5). <https://doi.org/10.1186/s12910-018-0341-y>
33. Dei GJS, Jajj M. Knowledge and Decolonial Politics: A Critical Reader [Internet]. BRILL; 2018. <https://brill.com/view/title/39014> DOI: 10.1163/9789004380059
34. Hartmann WE, Saint Arnault DM, Gone JP. Conceptualizing culture in (global) mental health: Lessons from an urban American Indian behavioral health clinic. *Social Science & Medicine*. 2022 May 1;301:114899. DOI: 10.1016/j.socscimed.2022.114899
35. MOH U. Policy Guidelines on Traditional Medicine Development. Uganda Government; 2005.
36. UBOS - Uganda. Statistical abstract 2022 - Uganda. Uganda: Uganda Bureau of Statistics (UBOS); 2023.
37. Akol A, Moland KM, Babirye JN, Engebretsen IMS. “We are like co-wives”: Traditional healers’ views on collaborating with the formal Child and Adolescent Mental Health System in Uganda. *BMC Health Serv Res*. 2018 Dec;18(1):258. DOI: 10.1186/s12913-018-3063-4

38. Dworkin SL. Sample Size Policy for Qualitative Studies Using In-Depth Interviews. *Arch Sex Behav.* 2012;41:1319–20. DOI: 10.1007/s10508-012-0016-6
39. Canel Çınarbaş D, Tuna E, Ar-Karci Y. Turkish muslim healers: A qualitative investigation of Hocas and their methods. *J Relig Health.* 2020 Oct;59(5):2397–413. <http://link.springer.com/10.1007/s10943-019-00885-9> DOI: 10.1007/s10943-019-00885-9
40. Boarcceach A. Local Knowledge, Traditional Healers and Psychology: Causes, Symptoms And Treatments of Mental, Disorders in Timor.Leste. *Diálogos (FFCH - UNTL).* 2019;4:169–89. <https://dialogosuntl.com/index.php/revista/article/view/72> DOI: 10.53930/27892182.dialogos.4.72
41. Bautista-Valarezo E, Duque V, Verdugo Sánchez AE, Dávalos-Batallas V, Michels NRM, Hendrickx K, et al. Towards an indigenous definition of health: an explorative study to understand the indigenous Ecuadorian people’s health and illness concepts. *Int J Equity Health.* 2020 Dec;19(1):101. <https://equityhealthj.biomedcentral.com/articles/10.1186/s12939-020-1142-8> DOI: 10.1186/s12939-020-1142-8
42. Ferrari FM. “Illness is nothing but injustice”: The revolutionary element in Bengali folk healing. *The Journal of American Folklore.* 2015;128(507):46–64. DOI: 10.5406/jamerfolk.128.507.0046
43. Mishra A. Recipes for immortality: Medicine, religion, and community in South India by Richard S. Weiss. *Medical Anthropology Quarterly.* 2010 Jun;24(2):274–6. <https://onlinelibrary.wiley.com/doi/10.1111/j.1548-1387.2010.01102.x> DOI: 10.1111/j.1548-1387.2010.01102.x
44. Sujatha V. Pluralism in Indian medicine: Medical lore as a genre of medical knowledge. *Contributions to Indian Sociology.* 2007 May;41(2):169–202. <http://journals.sagepub.com/doi/10.1177/006996670704100202> DOI: 10.1177/006996670704100202
45. Liamputtong P, editor. *Public health: local and global perspectives* [Internet]. Third edition. Cambridge, United Kingdom: Cambridge University Press; 2022. <https://www.cambridge.org/9781009048569>
46. World Health Organization. *Basic documents*; including amendments adopted up to 31st May 2009. 47th ed. Geneva: World Health Organization; 2009.
47. Amoretti MC, Lalumera E. Wherein is the concept of disease normative? From weak normativity to value-conscious naturalism. *Med Health Care and Philos.* 2022 Mar;25(1):47–60. <https://link.springer.com/10.1007/s11019-021-10048-x> DOI: 10.1007/s11019-021-10048-x
48. Sonowal CJ, Konc P. Disease Burden, Health-belief and Treatment-seeking Behaviour among the Particularly Vulnerable Tribal Groups of India. *Ethno Medicine.* 2021;15(1–2):60–73. DOI: 0.31901/24566772.2021/15.1-2.624
49. De-Graft Aikins A, Marks DF. Health, Disease and Healthcare in Africa. *J Health Psychol.* 2007;12(3):387–402. <http://journals.sagepub.com/doi/10.1177/1359105307076228> DOI: 10.1177/1359105307076228
50. Alqahtani H. Statistical methods for enhanced reporting and analysis of COVID-19 survey data sets generated by internal public health bodies in Saudi Arabia: a biostatistical study [Internet].

- In Review; 2022 Jul. <https://www.researchsquare.com/article/rs-1804844/v1> DOI: 10.21203/rs.3.rs-1804844/v1
51. Fugl-Meyer K. A medical social work perspective on rehabilitation. *J Rehabil Med*. 2016;48(9):758–63. <https://medicaljournalssweden.se/jrm/article/view/15475> DOI: 10.2340/16501977-2146
  52. Keiran E. Health is in the eye of the beholder: Exploring normative and empirical conceptions of health and illness. *SOPHIA: Journal of Philosophy Volume*. 2022;XVI(2020–2022):21–34.
  53. Paulon M. Hysteria: rise and fall of a baffling disease. A review on history of ideas in medicine. *Journal of Psychopathology*. 2022 Sep;152–61. <https://doi.org/10.36148/2284-0249-461> DOI: 10.36148/2284-0249-461
  54. Madeira L, Leal B, Filipe T, Rodrigues MF, Figueira ML. The uncanny of the illness experience: Can phenomenology help? *Psychopathology*. 2019;52(5):275–82. <https://www.karger.com/Article/FullText/504141> DOI: 10.1159/000504141
  55. Charan IA, Xin S, Zezhuang W, Yao D. Rethinking efficacy: People’s perception of ritual healing and trance religious practices at shrines in Pakistan. *Asian Journal of Psychiatry*. 2020 Aug;52:102020. <https://linkinghub.elsevier.com/retrieve/pii/S1876201820301313> DOI: 10.1016/j.ajp.2020.102020
  56. Powell R, Scarffe E. ‘Rethinking “Disease”’: a fresh diagnosis and a new philosophical treatment.’ *J Med Ethics*. 2019 Sep;45(9):579–88. <https://jme.bmj.com/lookup/doi/10.1136/medethics-2019-105465> DOI: 10.1136/medethics-2019-105465
  57. Kirmayer LJ. Abstracts and Reviews: The Illness Narratives: Suffering, Healing and the Human Condition by Arthur Kleinman. New York: Basic Books (1988). *Transcultural Psychiatric Research Review*. 1989 Sep;26(3):202–4. <http://journals.sagepub.com/doi/10.1177/136346158902600303> DOI: 10.1177/136346158902600303
  58. Ines Amada L, Soledad Burgos V, Ferreyra M, Leguizamón Ibañez DB, Estefanía Lopez V, Rivas Medina DZ, et al. Social construction of illness and disease. *Community and Interculturality in Dialogue*. 2023 Nov 9;3:65. <https://cid.saludcyt.ar/index.php/cid/article/view/65> DOI: 10.56294/cid202365
  59. Pool R. *Dialogue and the Interpretation of Illness: Conversations in a Cameroon Village* [Internet]. 1st ed. Routledge; 2020. <https://www.taylorfrancis.com/books/9781000325065> DOI: 10.4324/97810003135173
  60. Galvin M, Michel G, Manguira E, Pierre E, Lesorogol C, Trani JF, et al. Examining the Etiology and Treatment of Mental Illness Among Vodou Priests in Northern Haiti. *Cult Med Psychiatry*. 2023 Sep;47(3):647–68. <https://link.springer.com/10.1007/s11013-022-09791-4> DOI: 10.1007/s11013-022-09791-4
  61. Guidos B, Calvario J, Hendrika van Zuilen M. A brief qualitative study of indigenous traditional medicine providers in Timor-Leste. *Diálogos (FFCH - UNTL)*. 2022 Nov 16;7:203–16. <https://dialogosuntl.com/index.php/revista/article/view/8> DOI: 10.53930/27892182.dialogos.7.8

62. Workneh T, Emirie G, Kaba M, Mekonnen Y, Kloos H. Perceptions of health and illness among the Konso people of southwestern Ethiopia: persistence and change. *J Ethnobiology Ethnomedicine*. 2018 Dec;14(1):18. DOI: 10.1186/s13002-018-0214-y
63. Trinos K, Mudaly R. Exploring possibilities for including indigenous knowledge into the biology teacher education curriculum: Leveraging insights from Karanga knowledge holders. *Alternation*. 2020 Dec 1;SP36. <http://alternation.ukzn.ac.za/Files/articles/special-editions/36/05-trinos.pdf> DOI: 10.29086/2519-5476/2020/sp36a5
64. den Boon P. *Illness and Disease, a new Perspective* [Internet] [Thesis]. [Erasmus]: Erasmus University Rotterdam; 2019. file:///C:/Users/USER/Downloads/Bachelor-Thesis-door-Pim-den-Boon.pdf
65. Choifer A. A New Understanding of the First-Person and Third-Person Perspectives. *Philosophical Papers*. 2018;47(3):333–71. DOI: 0.1080/05568641.2018.1450160
66. Inthorn J. Cross-cultural bioethics as an interdisciplinary approach. In: Kappas M, Kelleher D, editors. *A challenge of interdisciplinary research*. Universitätsverlag Göttingen; 2012.
67. Nunstedt H, Rudolfsson G, Alsén P, Pennbrant S. Strategies for healthcare professionals to facilitate patient illness understanding. *Journal of Clinical Nursing*. 2017 Dec;26(23–24):4696–706. <https://onlinelibrary.wiley.com/doi/10.1111/jocn.13820> DOI: 10.1111/jocn.13820
68. M. Sabir, Muh. Ardi Munir, Tri Setyawati, Muhammad Nasir, Ary Anggara, Ressay Dwiyantri, et al. Understanding Rural Perspectives and Practices of Health in Banggai Laut, Indonesia. *IJHES*. 2023 Jun 26;5(3):169–77. <https://jurnal.unismuhpalu.ac.id/index.php/IJHES/article/view/3734> DOI: 10.56338/ijhess.v5i3.3734
69. Salifu Yendork J, Kpobi L, Sarfo EA. “It’s only ‘madness’ that I know”: analysis of how mental illness is conceptualised by congregants of selected Charismatic churches in Ghana. *Mental Health, Religion & Culture*. 2016 Oct 20;19(9):984–99. <https://www.tandfonline.com/doi/full/10.1080/13674676.2017.1285877> DOI: 10.1080/13674676.2017.1285877
70. Kahissay MH, Fenta TG, Boon H. Beliefs and perception of ill-health causation: a socio-cultural qualitative study in rural North-Eastern Ethiopia. *BMC Public Health*. 2017 Dec;17(1):124. <http://bmcpublihealth.biomedcentral.com/articles/10.1186/s12889-017-4052-y> DOI: 10.1186/s12889-017-4052-y
71. Salifu A, Hamdan AY, Habibu I. Divination and Health Decision-Making among the Dagomba. *ADRR JOURNALS*. 2021;30(7). <https://www.journals.adrri.org>
72. Kennedy C, O’Connor G. Using health assessment skills in a non-medical prescribing chemotherapy clinic. *Gastrointestinal Nursing*. 2016 Nov 2;14(9):46–50. <http://www.magonlinelibrary.com/doi/10.12968/gasn.2016.14.9.46> DOI: 10.12968/gasn.2016.14.9.46
73. Quigley F, Martin DS. History-taking and clinical examination skills from a stoma nurse’s perspective. *Gastrointestinal Nursing*. 2013 Oct 2;11(8):29–36. <http://www.magonlinelibrary.com/doi/10.12968/gasn.2013.11.8.29> DOI: 10.12968/gasn.2013.11.8.29

74. Ngobe A, Semanya S, Sodi T. Psychological ailments and their treatment protocols: a case study of Swati traditional healers in Mpumalanga Province, South Africa. *Afr H Sci.* 2021 Aug 2;21(2):884–95. <https://www.ajol.info/index.php/ahs/article/view/211801> DOI: 10.4314/ahs.v21i2.50
75. Maia LO, Daldegan-Bueno D, Tófoli LF. The ritual use of ayahuasca during treatment of severe physical illnesses: a qualitative study. *Journal of Psychoactive Drugs.* 2021 May 27;53(3):272–82. <https://www.tandfonline.com/doi/full/10.1080/02791072.2020.1854399> DOI: 10.1080/02791072.2020.1854399
76. Sukmawan S, Sahiruddin S. Tradition-responsive Approach as Non-medical Treatment in Mitigating the Covid-19 Pandemic in Tengger, East Java, Indonesia. In: *Proceedings of the 1st International Seminar on Cultural Sciences, ISCS 2020, 4 November 2020, Malang, Indonesia.* Malang, Indonesia: EAI; 2021. <http://eudl.eu/doi/10.4108/eai.4-11-2020.2308894> DOI: 10.4108/eai.4-11-2020.2308894
